# Supplementary material
Source: PubMed Central journal article supplement (PMC6926467)
Supplement: supp_RA119.011317_156219_1_supp_416480_pzsysf.pdf [file supp_RA119.011317_156219_1_supp_416480_pzsysf.pdf]

# Tubacin Attenuates Endothelial Dysfunction through Upregulating Endothelial Nitric Oxide Synthase Expression

## Supplemental Figure and Figure Legend

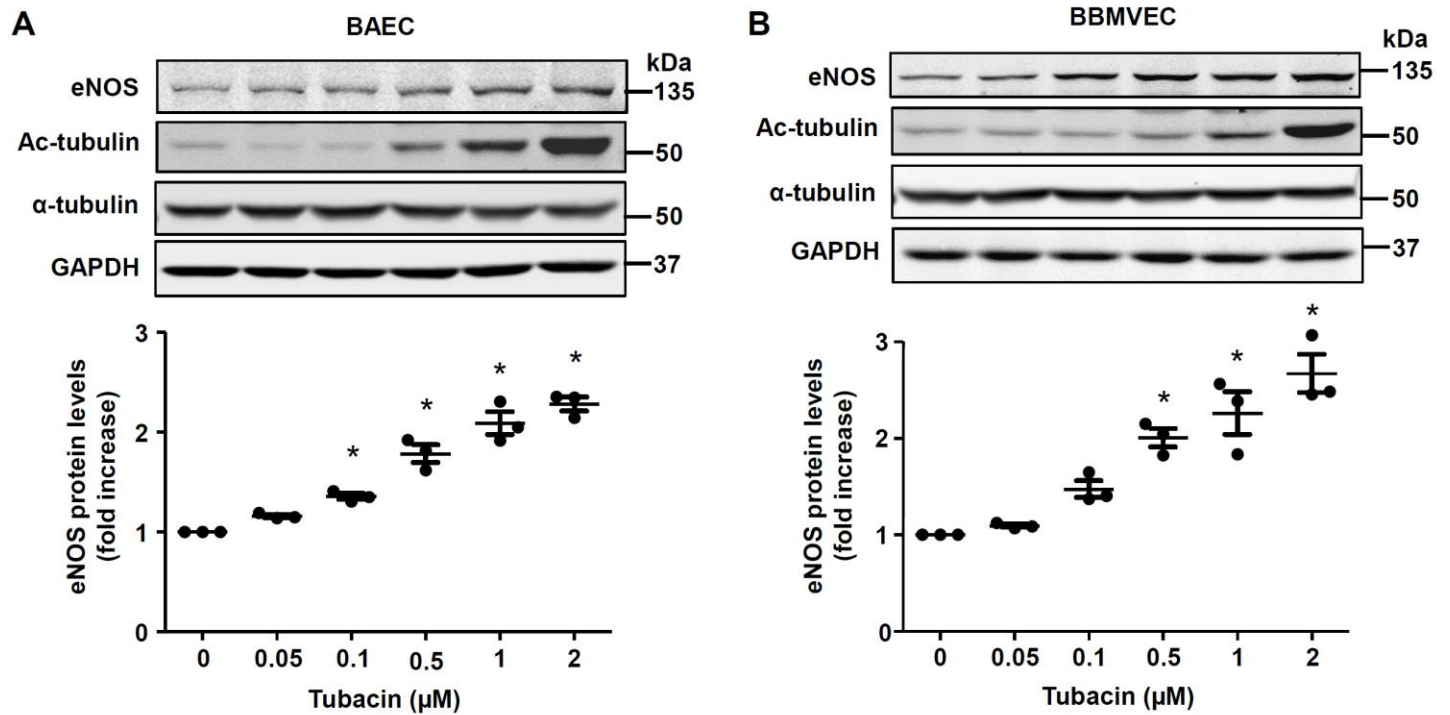

**Supplemental Figure 1:** Tubacin increases expression of eNOS in bovine aortic endothelial cells (BAECs) and bovine brain microvessel endothelial cells (BBMECs). a, b eNOS protein levels in BAEC (a) and BBMECs (b) exposed to Tubacin (0-2  $\mu\text{mol/L}$ ) for 24 hrs. Quantitative analysis of protein levels are depicted in bar graphs. Mean  $\pm$  SEM.  $n=3$ ; \* $P < 0.05$  vs. 0  $\mu\text{M}$ .
